# Supplementary material for: Anti-Helicobacter pylori Activity of Artemisia ludoviciana subsp. mexicana and Two of Its Bioactive Components, Estafiatin and Eupatilin
Source: MDPI journal article supplement (doi:10.3390/molecules26123654), 2021-06-15
Supplement: s1 [file s1]

## SUPPLEMENTARY MATERIAL

### ***Anti-Helicobacter pylori* activity of *Artemisia ludoviciana* subsp. *mexicana* and two of its bioactive components, Estafiatin and Eupatilin**

**Juan Francisco Palacios-Espinosa<sup>1</sup>, Pablo Noé Núñez-Aragón<sup>2</sup>, Erika Gomez-Chang<sup>2</sup>, Edelmira Linares<sup>3</sup>, Robert Bye<sup>3</sup>, and Irma Romero<sup>2\*</sup>**

#### **Affiliations**

<sup>1</sup> Departamento de Sistemas Biológicos, División de Ciencias Biológicas y de la Salud, Universidad Autónoma Metropolitana-Xochimilco (UAM-X), Ciudad de México 04960, México. jpalacios@correo.xoc.uam.mx

<sup>2</sup> Departamento de Bioquímica, Facultad de Medicina, Universidad Nacional Autónoma de México (UNAM), Ciudad Universitaria, Ciudad de México 04510, México. pablo.nunez@uaem.mx, ergoc@bq.unam.mx, irma@bq.unam.mx

<sup>3</sup> Jardín Botánico, Instituto de Biología, Universidad Nacional Autónoma de México (UNAM), Ciudad Universitaria, Ciudad de México 04510, México. mazari@ib.unam.mx, rbye@ibiologia.unam.mx

\* Correspondence: irma@bq.unam.mx; Tel.: +52 55 56-23-25-11.

## Supplementary material

| Table of Contents |                                                                           |  |      |
|-------------------|---------------------------------------------------------------------------|--|------|
|                   |                                                                           |  | Page |
| <b>Figure 1S</b>  | <sup>1</sup> H NMR spectrum of Estafiatin in CDCl <sub>3</sub> (500 MHz)  |  | 3    |
| <b>Figure 2S</b>  | <sup>13</sup> C NMR spectrum of Estafiatin in CDCl <sub>3</sub> (125 MHz) |  | 4    |
| <b>Figure 3S</b>  | <sup>1</sup> H NMR spectrum of Eupatilin in CDCl <sub>3</sub> (600 MHz)   |  | 5    |
| <b>Figure 4S</b>  | <sup>13</sup> C NMR spectrum of Eupatilin in CDCl <sub>3</sub> (151 MHz)  |  | 6    |

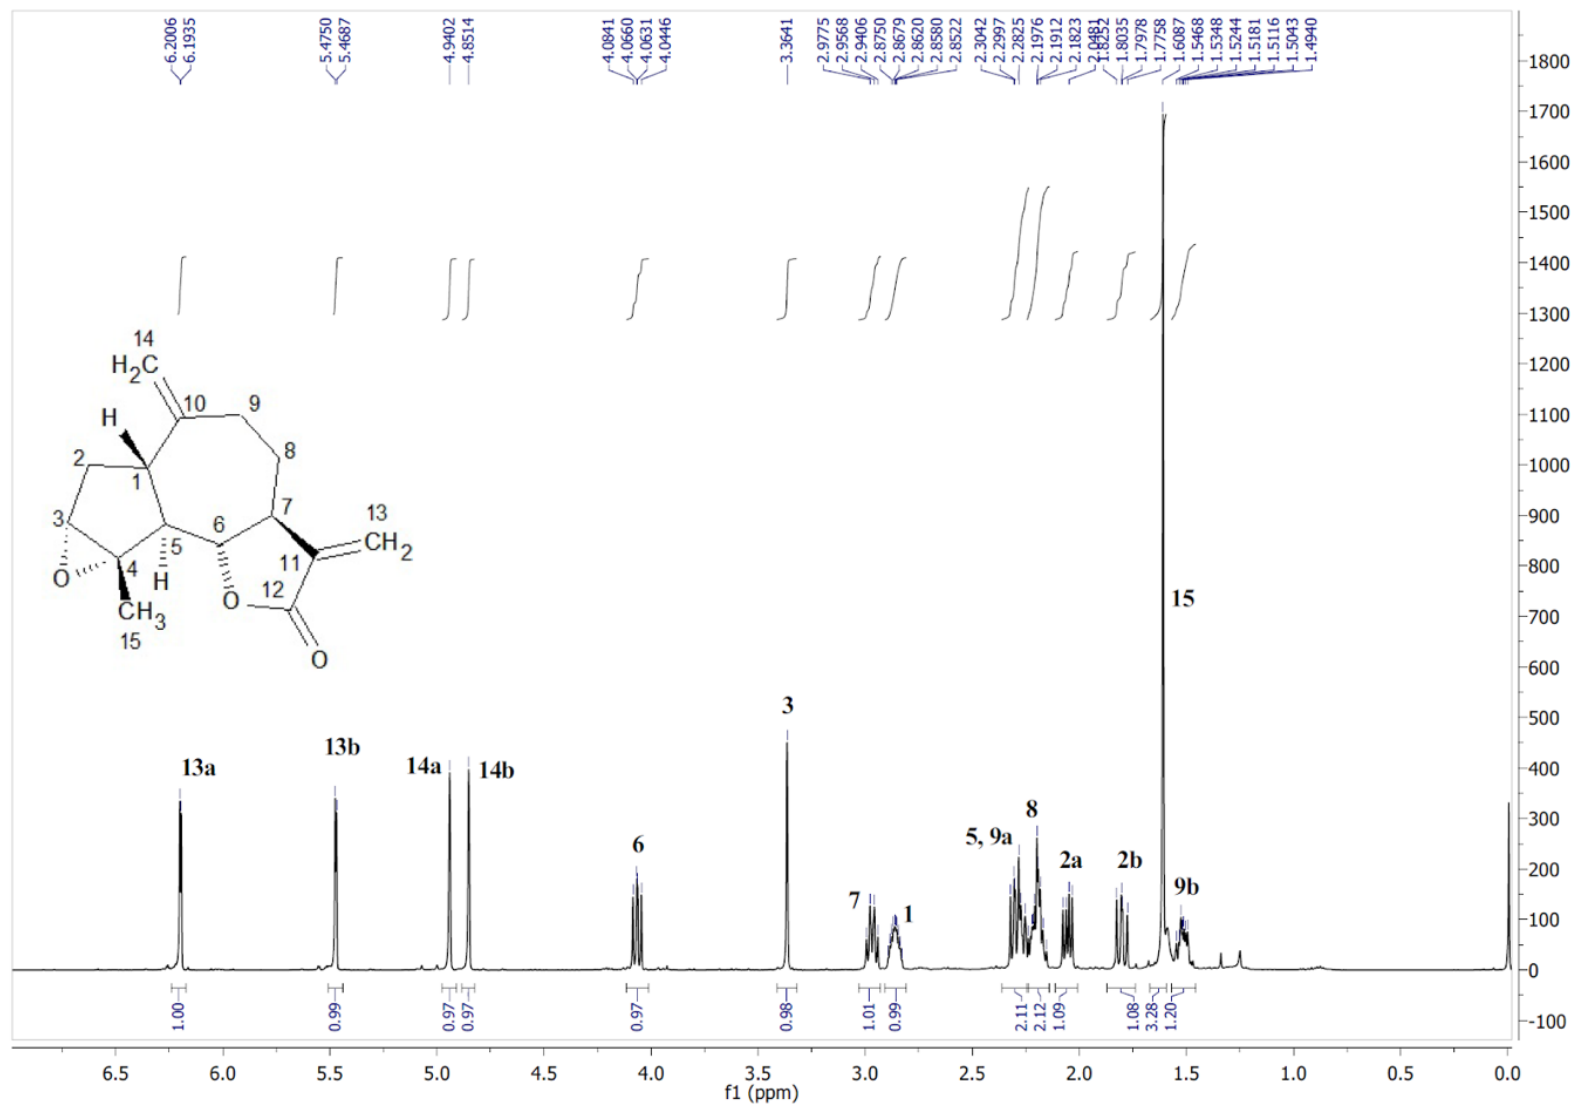

Figure 1S. <sup>1</sup>H NMR spectrum of Estafiatin in CDCl<sub>3</sub> (500 MHz).

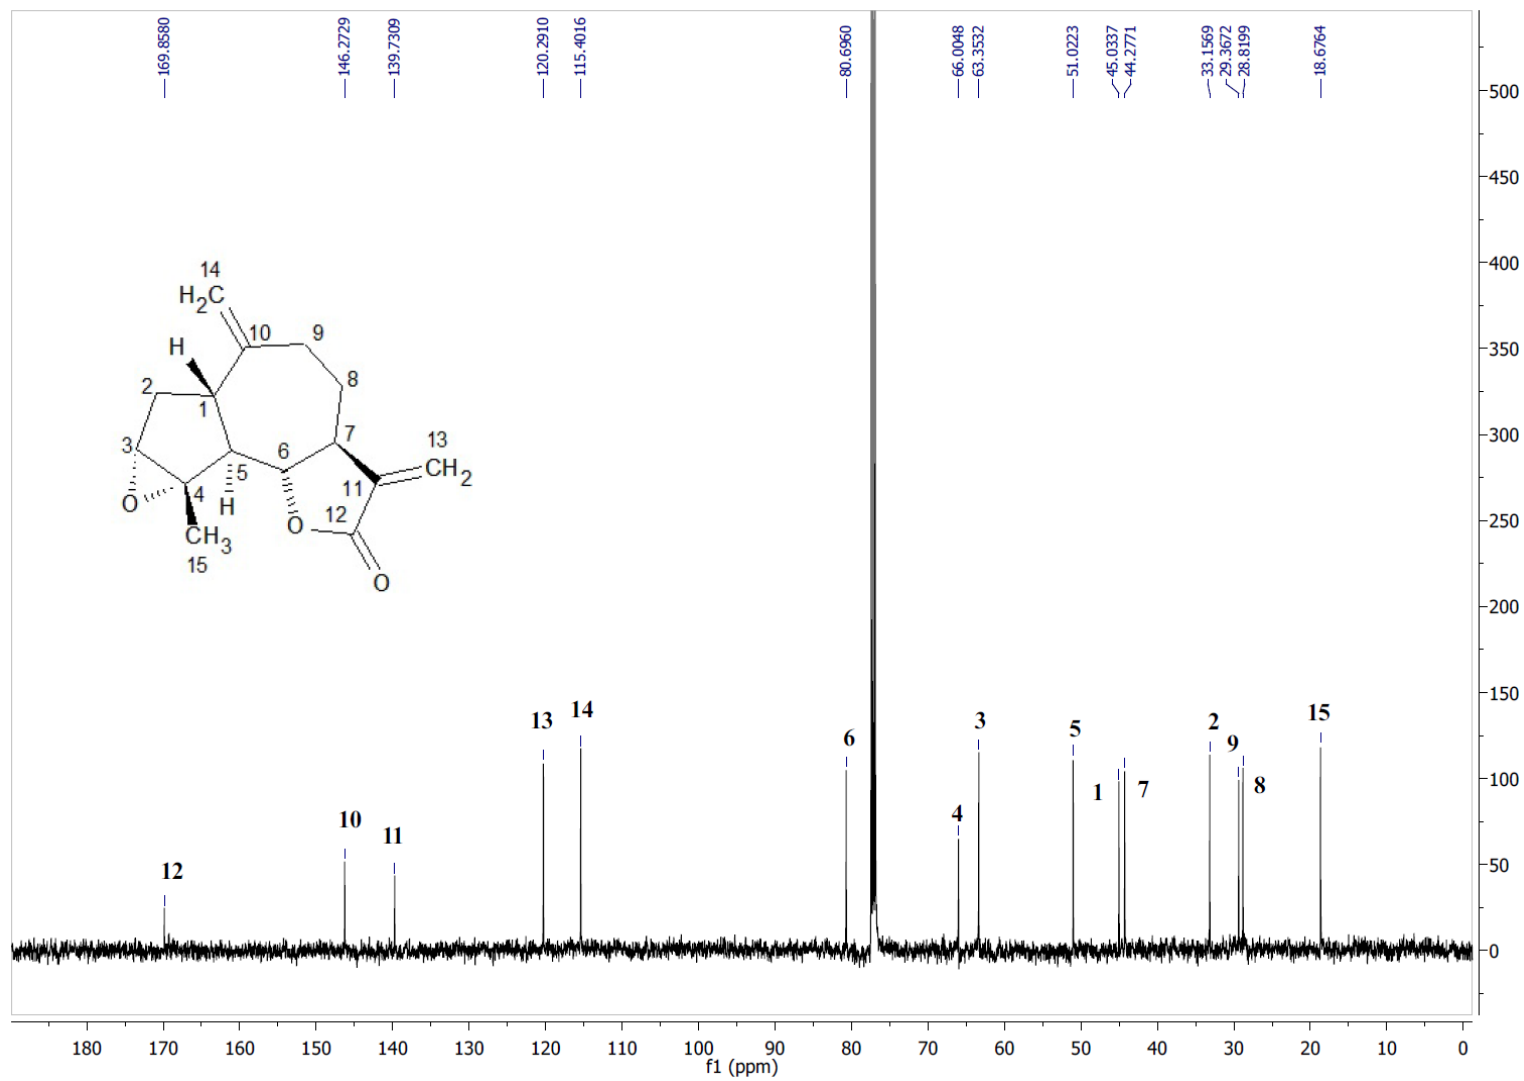

Figure 2S.  $^{13}\text{C}$  NMR spectrum of Estafiatin in  $\text{CDCl}_3$  (125 MHz).

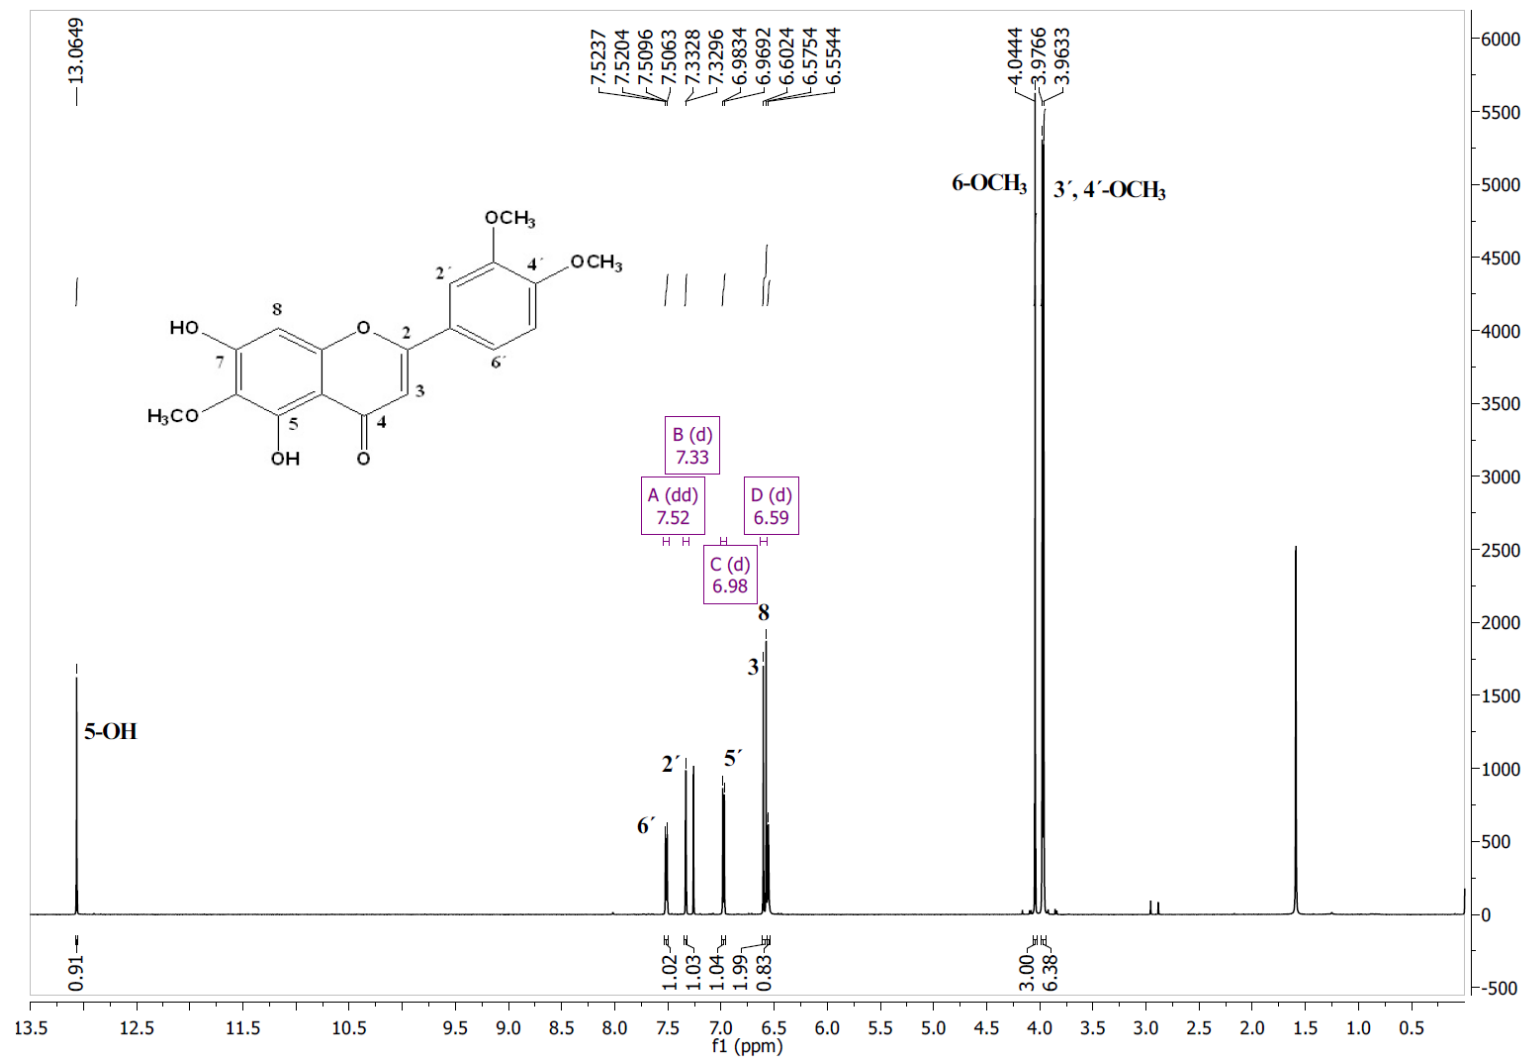

Figure 3S.  $^1\text{H}$  NMR spectrum of Eupatilin in  $\text{CDCl}_3$  (600 MHz).

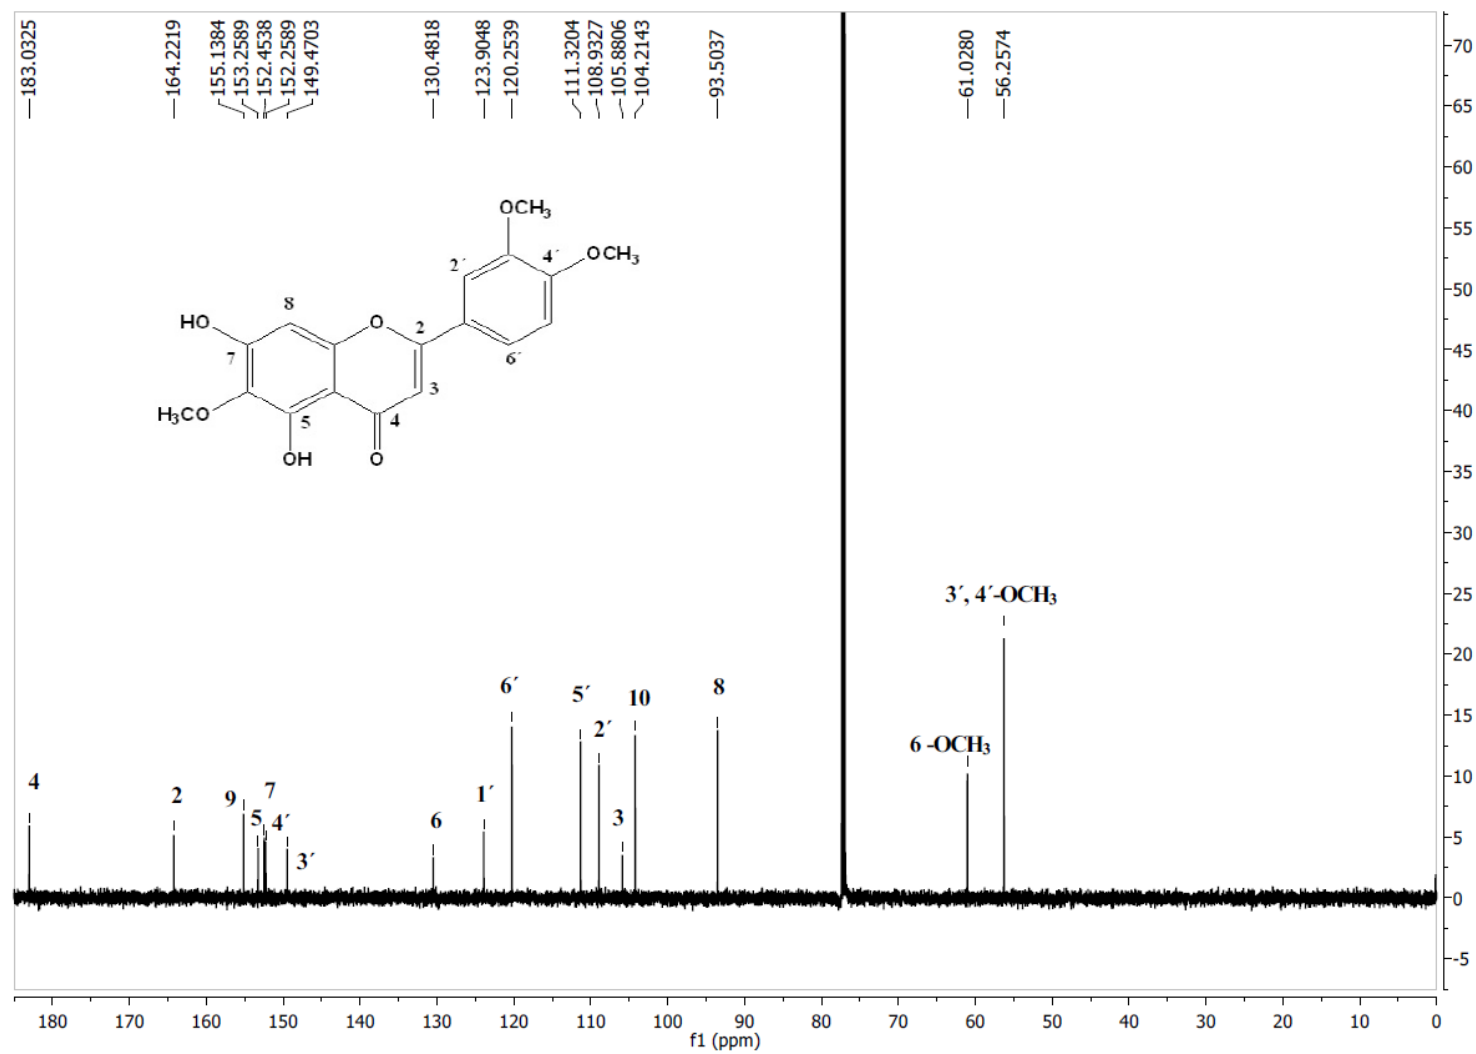

Figure 4S. <sup>13</sup>C NMR spectrum of Eupatilin in CDCl<sub>3</sub> (151 MHz).
